# Supplementary material for: The benefits of Tai Chi and brisk walking for cognitive function and fitness in older adults
Source: PeerJ. 2017 Oct 20;5:e3943. doi: 10.7717/peerj.3943 (PMC5652256; doi:10.7717/peerj.3943)
Supplement: Supplemental Information 1 [file peerj-05-3943-s001.xlsx]

## Sheet: Sheet1
GP	Delay.ACC	Delay.RT	non-delay.ACC	non-delay.RT	Naming.ACC	Naming.RT	Inhibition.ACC	Inhibition.RT	Executive.ACC	Executive.RT	age	weight	hight	BMI	MMSN	Education	M/F	Muscle strength	TUG	cos-TUG	mery-TUG	6MWT	IPAQ MET
TG	1	691.75	1	629.05	0.9	377.56	1	490.5	0.966667	943.517	66	57	169	19.9573	27	10	0	21.5	6.17	6.81	6.25	591.295	2386
TG	1	691.05	1	619.04	0.9	477.56	1	500.151	0.966667	1043.33	67	67	167	24.0238	27	10	0	26.9	6.27	6.98	6.55	580.289	2586
TG	1	690.75	1	639.05	1	497.56	1	510.143	0.966667	943.617	66	60	162	22.8624	27	10	0	23.5	6.32	6.67	6.12	566.707	2124
TG	1	602.75	1	671.3	1	451.6	1	524.11	0.9	1107.56	70	63	171	21.5451	28	9	1	37.5	5.76	6.91	6.23	594.818	2262
TG	1	703.71	1	672.67	1	461.1	1	534.12	0.9	1000.78	70	63	174	20.8086	28	9	1	35.7	5.76	6.91	6.23	594.53	2862.6
TG	0.95	807.789	1	688.7	1	500	1	542.8	0.733333	1027.86	64	49	168	17.3611	29	10	1	35.9	6.15	7.29	6.47	594.464	2347.7
TG	1	603.23	1	671.3	1	451.07	1	554.15	0.9	1147.56	70	63	171	21.5451	28	9	1	37.2	5.76	6.91	6.23	586.708	2761.8
TG	0.95	643.368	0.95	631.368	1	491.8	1	557.9	0.833333	1197.58	72	56	162	21.3382	29	11	0	26.4	5.67	6.11	5.68	574.005	2678.4
TG	0.9	643.368	1	729.8	1	528.8	1	566.3	0.9	983.185	67	63	164	23.4236	27	11	0	26.2	6.12	7.81	6.98	576.219	3093.6
TG	0.85	654.462	1	593.6	1	423.83	0.9	579.778	0.733333	936.5	61	56	153	23.9224	27	9	0	24.8	5.54	6.41	5.88	547.095	1777.5
TG	0.85	654.462	1	591.1	1	425.91	0.9	559.778	0.733333	933.6	61	56	153	23.9224	27	9	0	19.8	5.81	6.41	5.88	554.75	2124
TG	0.85	734.47	1	593.6	1	423.83	0.9	569.778	0.733333	1036.5	61	56	153	23.9224	27	9	0	19.1	5.48	6.41	5.88	546.69	1662
TG	0.8	762.188	1	651.7	0.9	598.86	1	580.05	0.7	854.381	73	48	158	19.2277	28	11	0	25.8	5.26	7.38	6.65	569.401	2062.6
TG	1	706.89	1	829.8	1	421.1	0.85	585.235	0.766667	1102.48	65	65	166	23.5883	28	10	0	26.8	6.47	7.18	6.53	571.74	3084
TG	1	706.89	1	650.1	1	514.61	0.95	603.6	0.809524	1007.73	63	60	159	23.7332	28	11	1	35.4	6.03	6.93	6.3	564.966	1462
TG	1	607.21	1	651.1	1	515.61	1	604.6	1.80952	1008.73	64	61	160	23.8281	29	11	1	36.4	7.03	7.93	7.3	570.309	2742.6
TG	1	838.6	1	614	1	577.67	0.95	615.167	0.766667	793.739	65	55	163	20.7008	28	15	1	37.5	6.23	7.12	6.98	576.498	2747.7
TG	1	839.6	1	610	1	567.21	0.95	635.237	0.766667	793.739	61	55	163	20.7008	28	15	1	37.5	6.75	7.26	6.9	584.153	3001.8
TG	1	611.7	1	519.8	1	475.5	1	642.85	1	1056.57	65	51	154	21.5045	29	11	0	22.9	5.78	7.08	6.55	556.591	3481.8
TG	1	627.05	1	598.278	1	537.7	1	644.6	0.833333	1024.2	66	66	164	24.539	28	13	0	26.1	5.84	7.51	6.38	570.336	2598.4
TG	1	627.05	1	599.12	1	537.7	1	645.6	0.833333	1004.2	66	66	164	24.539	28	13	0	26.1	5.84	7.51	6.38	568.15	2493.6
TG	0.9	715.778	1	641.15	1	580.88	1	655.2	0.833333	1095.11	67	60	162	22.8624	29	9	0	23.7	7.21	8.13	7.75	569.122	1977.5
TG	0.9	582.5	0.95	616.21	1	548.3	1	671.6	0.8	1024.2	70	70	171	23.939	28	11	1	38.9	6.25	7.18	6.92	586.612	2604
TG	0.8	722.02	1	704.5	1	591	0.85	674.666	0.766667	926.845	72	61	163	22.9591	28	13	0	26.2	5.61	6.12	6.08	567.165	2262
TG	0.8	712.312	1	704.5	1	691	0.9	784.667	0.766667	1095.11	65	61	163	22.9591	28	13	0	24.7	6.01	6.32	6.2	574.82	2761.8
TG	0.8	775.312	1	704.5	1	691	0.7	603.6	0.766667	997.8	65	61	163	22.9591	28	13	0	21.6	5.91	6.02	5.8	566.76	2678.4
TG	0.8	774.21	1	701.43	1	501	1	694.43	0.766667	854.381	65	61	163	22.9591	28	13	0	25.3	6.11	6.22	6.4	568.895	2493.6
TG	0.8	712.312	1	704.5	1	691	0.9	784.667	0.766667	997.81	65	61	169	21.3578	28	13	1	37.8	5.91	6.3	6.12	582.253	1577.5
BG	0.85	712.312	1	760.95	1	711	1	817.706	0.866667	1396.31	68	60	162	22.8624	29	9	0	20.1	7.71	7.48	7.55	574.878	3084
BG	1	944.75	1	624.5	1	482.111	1	560.75	1	1319.37	65	60	166	21.7738	28	11	1	38.2	5.28	5.73	5.28	588.945	1462
BG	0.95	1027.79	0.857143	707.167	1	576.778	1	602.632	0.933333	1409.82	71	45	155	18.7305	27	13	0	20.8	7.47	7.7	7.2	567.444	3481.8
BG	0.8	1025.19	1	760.95	1	493.556	1	650.1	0.866667	1101.27	70	69	173	23.0546	26	15	0	25.3	6.58	7.19	6.33	598.856	2678.4
BG	0.95	842.368	1	624.5	0.8	454.375	0.9	628.818	0.7	793.238	67	58	158	23.2335	29	11	0	25.3	7.74	8.18	7.07	562.421	2093.6
BG	1	686.45	1	558.4	1	463	1	649	1	1056.63	59	56	160	21.875	26	10	0	26.8	7.36	8.14	6.7	571.644	1537.5
BG	1	1123.5	1	681.05	0.9	681.75	1	854.1	0.933333	1198.5	63	47	150	20.8889	29	9	0	20.2	5.81	6.61	6.41	552.13	2124
BG	0.95	785.053	1	515.75	1	664.9	1	562.25	0.933333	1033.07	62	45	155	18.7305	28	11	0	25.9	5.48	6.54	5.85	569.344	2262
BG	0.95	1009.32	1	685.25	0.9	482	1	581.7	0.8	1140.54	60	52	170	17.9931	29	10	1	34.9	5.01	5.95	5.78	605.236	2262.6
BG	0.95	682.789	1	570.25	1	637.556	1	607.3	0.866667	882.462	64	55	162	20.9572	27	9	1	28.5	6.14	6.48	6.31	574.352	2262.6
BG	0.9	794.222	1	569.4	1	539	1	629.85	0.766667	1302.65	73	64	168	22.6757	28	11	1	35.1	6.1	6.47	6.24	588.974	3001.8
BG	1	682	1	604.9	1	558	1	624.3	0.833333	1301.2	65	65	168	23.03	29	13	1	36.6	6.15	6.65	6.33	579.961	2478.4
BG	0.95	886.789	1	644.5	1	481.3	1	531.3	0.833333	1301.2	68	60	160	23.4375	28	11	0	29.1	6	6.6	6.41	566.137	2973.6
BG	1	701.8	1	649.25	1	585.1	1	829.053	0.9	1051.7	67	54	152	23.3726	27	10	0	28.6	6.44	7.08	6.66	548.946	1777.5
BG	0.9	923.778	1	597.3	0.9	401.889	0.95	637.421	0.866667	809.808	64	52	155	21.6441	28	9	0	20.9	6.17	7.49	6.4	567.653	1724
BG	0.9	854.3	1	649.25	1	520.8	0.95	650.1	0.666667	1280.4	65	65	167	23.3067	27	11	0	27.8	6.47	7.45	6.88	590.055	1422
BG	1	854.3	1	574.55	1	545.1	1	598.95	0.833333	1368.44	60	54	154	22.7694	29	13	0	23.1	6.13	7.3	6.78	559.562	2262.6
BG	0.95	771.105	1	555.3	0.9	595.333	1	728.25	0.766667	780.826	65	70	165	25.7117	27	15	0	27.2	5.37	7.28	6	580.464	2862.6
BG	1	689.95	1	591.3	1	519.8	1	650.1	0.833333	1458.2	63	57	165	20.9366	28	11	0	25.8	6.14	7.27	6.51	584.793	3601.8
BG	0.9	1057.44	1	619.25	1	619.9	1	569.4	0.8	1098.08	63	45	156	18.4911	28	10	0	23.3	6.2	6.15	6.2	575.049	2678.4
BG	1	695.35	1	550.95	1	724.8	1	555.25	0.833333	836.56	60	57	161	21.9899	27	9	0	28.2	6.26	6.38	6.33	574.381	2493.6
BG	0.9	895.32	1	751.4	1	619	1	779.85	0.766667	1302.65	73	64	168	22.6757	28	11	1	33.4	5.72	6.84	6.61	583.968	1777.5
BG	1	782	1	604.97	1	608	1	714.3	0.833333	951.2	65	65	168	23.03	29	13	1	35.5	5.86	6.72	6.51	586.721	1924
BG	0.95	786.21	1	644.5	1	571.3	1	701.3	0.833333	1301.2	68	60	160	23.4375	28	11	0	29.9	6	6.6	6.41	563.462	2142
BG	0.95	782.789	1	670.25	1	647.556	1	697.4	0.866667	1182.46	64	55	162	20.9572	27	9	0	28.5	6.14	6.48	6.31	581.062	2742.6
BG	0.9	795.21	1	669.65	1	569	1	629.85	0.766667	892.655	73	64	174	21.1389	28	11	1	37.9	6.59	7.74	7.6	595.512	3601.8
BG	1	783	1	604.12	1	588	1	724.3	0.833333	1191.2	65	65	168	23.03	29	13	1	36.8	6.86	7.52	6.69	581.15	2438.4
BG	1	855.08	1	674.55	1	565.1	1	658.95	0.833333	1168.44	60	54	154	22.7694	29	13	0	23.5	6.13	7.3	6.78	553.182	2493.6
CG	1	915.5	0.95	695.526	0.9	526.875	0.8	675.467	0.866667	1141.73	69	65	173	21.7181	29	9	1	32.8	6.2	6.68	6.61	536.008	327.5
CG	0.7	1031.64	1	642.85	1	681.2	1	892.333	0.866667	1568.24	60	70	162	26.6728	28	13	1	30.7	6.48	7.77	7.24	506.453	504
CG	0.95	808.211	1	540.15	1	691.6	0.9	1021.45	0.733333	1656.36	60	61	160	23.8281	28	11	0	22.5	7.08	7.41	6.91	502.549	132
CG	0.95	963.579	1	544.45	1	614	1	946.9	0.866667	1421.38	60	57	172	19.2672	29	10	1	30.8	5.25	6.07	5.34	545.101	455.4
CG	0.95	985.684	1	699.7	1	567	1	748.053	0.8	1618.67	67	62	160	24.2188	27	9	0	25.2	6.11	7.18	6.14	501.191	487.5
CG	0.75	915.5	1	540.15	1	617.5	1	947.647	0.933333	1483.14	64	51	165	18.7328	29	9	0	23.2	6.11	7.18	6.64	526.761	504
CG	1	772.5	0.95	688.895	0.8	525.857	0.95	614.722	0.666667	1722.1	65	62	160	24.2188	28	13	0	25.3	5.85	6.71	6.54	501.14	132
CG	0.95	809	0.95	718.737	0.9	552.889	1	702.8	0.5	1538.53	62	58	165	21.3039	29	11	0	20.2	6.11	6.31	6.42	527.8	455.4
CG	1	805.8	1	609.75	1	594	1	685.05	0.9	1422.07	63	60	164	22.3081	27	11	0	19.8	6.18	6.71	7.42	527.008	487.5
CG	1	805.8	1	609.75	1	693.9	0.95	1226.44	0.6	1822.83	66	63	159	24.9199	28	10	0	19.5	6.8	7.25	8.1	503.897	424
CG	1	915.5	1	699.75	1	692.1	1	994.55	0.9	1602.37	64	48	155	19.9792	28	9	0	23.3	6.45	7	6.65	515.485	292
CG	1	927.45	1	646.8	0.9	492.111	1	683.35	0.833333	1026.2	61	50	158	20.0288	28	11	0	19.9	7.07	8.3	7.53	513.291	695.4
CG	0.9	716.278	1	717.85	1	685.8	0.95	827.474	1	889.267	71	58	151	25.4375	29	13	0	20.3	7.17	7.67	7.57	489.668	487.5
CG	1	1187.9	1	684.3	1	701.1	0.8	1136.62	0.866667	1622.23	61	70	168	24.8016	27	15	1	30.1	6.73	7.9	8.44	520.086	264
CG	0.9	614.889	1	540.15	0.9	487.222	1	531.55	1	979.667	63	52	160	20.3125	29	11	1	28.9	6.95	7.25	6.21	524.181	247.5
CG	0.75	842.467	1	689.85	1	540.6	1	722.2	1	1292.23	66	46	150	20.4444	27	10	0	20.6	6.8	6.32	7	507.698	504
CG	0.95	747.526	1	620.05	0.9	460.111	1	525.8	0.8	1205.83	71	60	169	21.0077	27	9	1	37.8	6.42	7	7.32	536.276	292
CG	1	977.7	1	512.95	1	673.2	1	951.5	0.866667	1603.59	69	50	155	20.8117	28	9	0	21.6	6.47	7.37	6.04	517.194	735
CG	0.95	1141.47	0.95	644	0.5	552	1	553.55	0.833333	901.24	63	55	159	21.7555	27	13	0	20.7	7.44	8.11	7.46	514.731	438
CG	1	990.35	1	686.65	1	568.2	1	688	0.733333	1096.14	66	74	158	29.6427	27	11	0	23.5	7.58	8.4	7.9	496.168	455.4
CG	1	799.05	1	602.55	1	571.4	1	691.25	0.8	1249.17	65	68	169	23.8087	28	9	1	28.2	6.95	7.25	6.71	528.197	330
CG	0.9	744.889	1	640.15	0.9	569.222	1	731.55	1	1209.67	63	52	160	20.3125	29	11	0	28.9	6.53	7.17	6.81	519.086	537
CG	0.75	890.467	1	679.21	1	590.631	1	721.2	1	1392.23	66	46	150	20.4444	27	10	0	23.6	6.8	6.32	6.9	502.603	570
CG	0.95	947.526	1	720.05	0.9	660.111	1	825.8	0.8	1305.83	71	60	173	20.0474	27	9	1	34.8	6.42	7	7.32	541.543	695.4
CG	1	1007.7	1	712.15	1	773.2	1	951.5	0.8	1603.59	69	50	155	20.8117	28	9	0	21.6	6.47	7.37	6.84	512.099	247.5
CG	0.95	1141.47	0.95	744	1	652	1	863.75	0.833333	1301.24	65	55	153	23.4952	27	13	0	20.7	7.44	8.11	7.46	494.093	264
CG	1	1121.35	1	676.02	1	568.2	1	680	0.733333	1310.14	66	74	168	26.2188	27	11	0	19.5	7.58	8.4	7.9	516.978	372
CG	1	999.05	1	610.15	1	591.4	1	691.25	0.8	1249.17	65	68	169	23.8087	28	9	1	28.2	7.68	8.13	7.28	523.102	615.4
